# Supplementary material for: P-Glycoprotein–Mediated Efflux Reduces the In Vivo Efficacy of a Therapeutic Targeting the Gastrointestinal Parasite Cryptosporidium
Source: PubMed Central journal article supplement (PMC6736360; doi:10.1093/infdis/jiz269), 2019-06-08
Supplement: jiz269_suppl_supplementary_table_1.pdf [file jiz269_suppl_supplementary_table_1.pdf]

**Supplemental Table 1: Bumped kinase inhibitor Caco-2 apparent permeability ( $P_{app}$ ) and efflux ratio**

| Compound           | Direction | $P_{app}$ ( $10^{-6}$ cm/s) | Efflux Ratio   |
|--------------------|-----------|-----------------------------|----------------|
| <b>BKI 1369</b>    | A→B       | 12.4                        | 2.6            |
|                    | B→A       | 32.7                        |                |
| <b>BKI 1318</b>    | A→B       | 0.29                        | 69             |
|                    | B→A       | 20.3                        |                |
| <b>BKI 1294</b>    | A→B       | 12.7                        | 1.8            |
|                    | B→A       | 22.6                        |                |
| <b>Propranolol</b> | A→B       | 23.2                        | Not applicable |
| <b>Atenolol</b>    | A→B       | 0.21                        | Not applicable |
