# Supplementary material for: P-Glycoprotein–Mediated Efflux Reduces the In Vivo Efficacy of a Therapeutic Targeting the Gastrointestinal Parasite Cryptosporidium
Source: PubMed Central journal article supplement (PMC6736360; doi:10.1093/infdis/jiz269), 2019-06-08
Supplement: jiz269_suppl_supplementary_table_3.pdf [file jiz269_suppl_supplementary_table_3.pdf]

**Supplemental Table 3: Pharmacokinetics of bumped kinase inhibitors with co-administration of elacridar.**

| BKI      | C <sub>max</sub><br>( $\mu$ M) | C <sub>max</sub> w/<br>Elacridar<br>( $\mu$ M) | T <sub>max</sub><br>(hours) | T <sub>max</sub> w/<br>Elacridar<br>(hours) | AUC <sub>0-inf</sub><br>( $\mu$ mol*hr/L) | AUC <sub>0-inf</sub> w/<br>Elacridar<br>( $\mu$ mol*hr/L) |
|----------|--------------------------------|------------------------------------------------|-----------------------------|---------------------------------------------|-------------------------------------------|-----------------------------------------------------------|
| 1369     | 4.2 $\pm$                      | 4.1 $\pm$ 0.3                                  | 2.0 $\pm$                   | 4.0 $\pm$ 1.6                               | 75.6 $\pm$ 8.9                            | 91.4 $\pm$ 5.0                                            |
| 60 mg/kg | 0.7                            |                                                | 0.0                         |                                             |                                           |                                                           |
| 1318     | 1.0                            | 1.8                                            | 2.3 $\pm$                   | 2.0 $\pm$ 0.0                               | 6.6 $\pm$ 1.7                             | 12.0 $\pm$ 1.6*                                           |
| 50 mg/kg | $\pm$ 0.1                      | $\pm$ 0.4*                                     | 1.2                         |                                             |                                           |                                                           |

Note- BKI, Bumped kinase inhibitor; AUC, Area under the curve. \*P<0.05
