# Supplementary material for: P-Glycoprotein–Mediated Efflux Reduces the In Vivo Efficacy of a Therapeutic Targeting the Gastrointestinal Parasite Cryptosporidium
Source: PubMed Central journal article supplement (PMC6736360; doi:10.1093/infdis/jiz269), 2019-06-08
Supplement: jiz269_suppl_supplementary_table_5.pdf [file jiz269_suppl_supplementary_table_5.pdf]

**Supplemental Table 5: Elacridar pharmacokinetics in the gastrointestinal tract**

| GI Segment  | Observed<br>$C_{max}$<br>( $\mu\text{M}$ ) | $T_{max}$<br>(hours) | $AUC_{0-12}$<br>( $\mu\text{mole}\cdot\text{hr}/\text{L}$ ) |
|-------------|--------------------------------------------|----------------------|-------------------------------------------------------------|
| Duodenum    | 61.2 $\pm$<br>20.9                         | 0.6 $\pm$<br>0.2     | 118.0 $\pm$ 4.9                                             |
| Jejunum     | 32.6                                       | 0.6 $\pm$<br>0.2     | 103.9 $\pm$ 21.4                                            |
| Ileum       | 35.2 $\pm$<br>10.3                         | 1.7 $\pm$<br>0.5     | 170.0 $\pm$ 45.7                                            |
| Cecum/Colon | 3.3 $\pm$ 3.1                              | 6.0 $\pm$<br>4.3     | 12.6 $\pm$ 8.5                                              |
